# Supplementary material for: Structure and assembly of CAV1 8S complexes revealed by single particle electron microscopy
Source: PubMed Central journal article supplement — Sci Adv. 2020 Dec 2;6(49):eabc6185. doi: 10.1126/sciadv.abc6185 (PMC7821874; doi:10.1126/sciadv.abc6185), 2020-12-02
Supplement: abc6185_SM.pdf [file abc6185_SM.pdf]

[advances.sciencemag.org/cgi/content/full/6/49/eabc6185/DC1](https://advances.sciencemag.org/cgi/content/full/6/49/eabc6185/DC1)

## Supplementary Materials for

### **Structure and assembly of CAV1 8S complexes revealed by single particle electron microscopy**

Bing Han, Jason C. Porta, Jessica L. Hanks, Yelena Peskova, Elad Binshtein, Kelly Dryden, Derek P. Claxton,  
Hassane S. Mchaourab, Erkan Karakas, Melanie D. Ohi\*, Anne K. Kenworthy\*

\*Corresponding author. Email: [mohi@umich.edu](mailto:mohi@umich.edu) (M.D.O.); [akk7hp@virginia.edu](mailto:akk7hp@virginia.edu) (A.K.K.)

Published 2 December 2020, *Sci. Adv.* **6**, eabc6185 (2020)  
DOI: 10.1126/sciadv.abc6185

#### **This PDF file includes:**

Figs. S1 to S6  
Tables S1 to S3

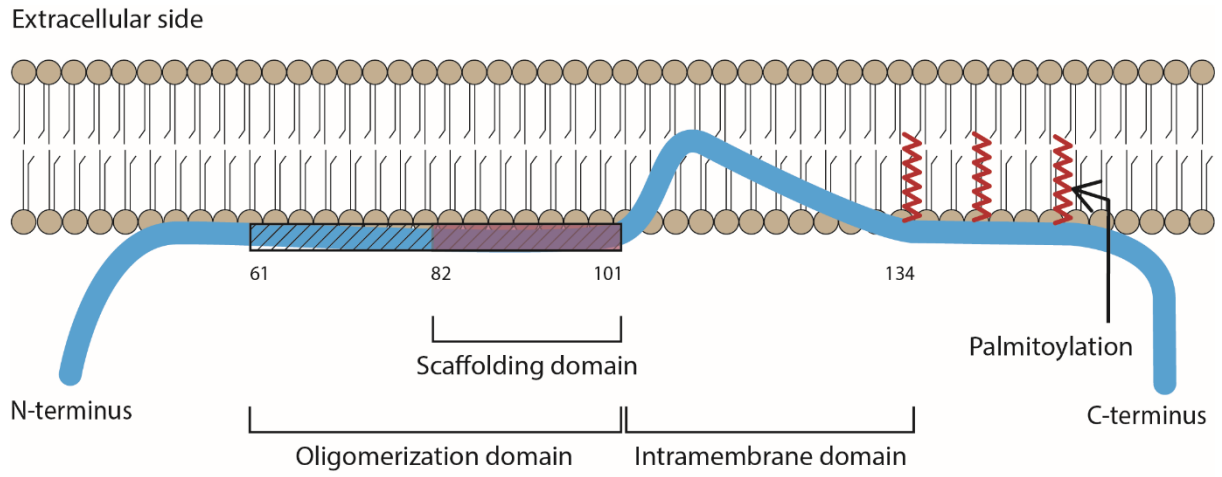

Figure S1

**Figure S1. Cartoon of caveolin domain structure.** See text for details.

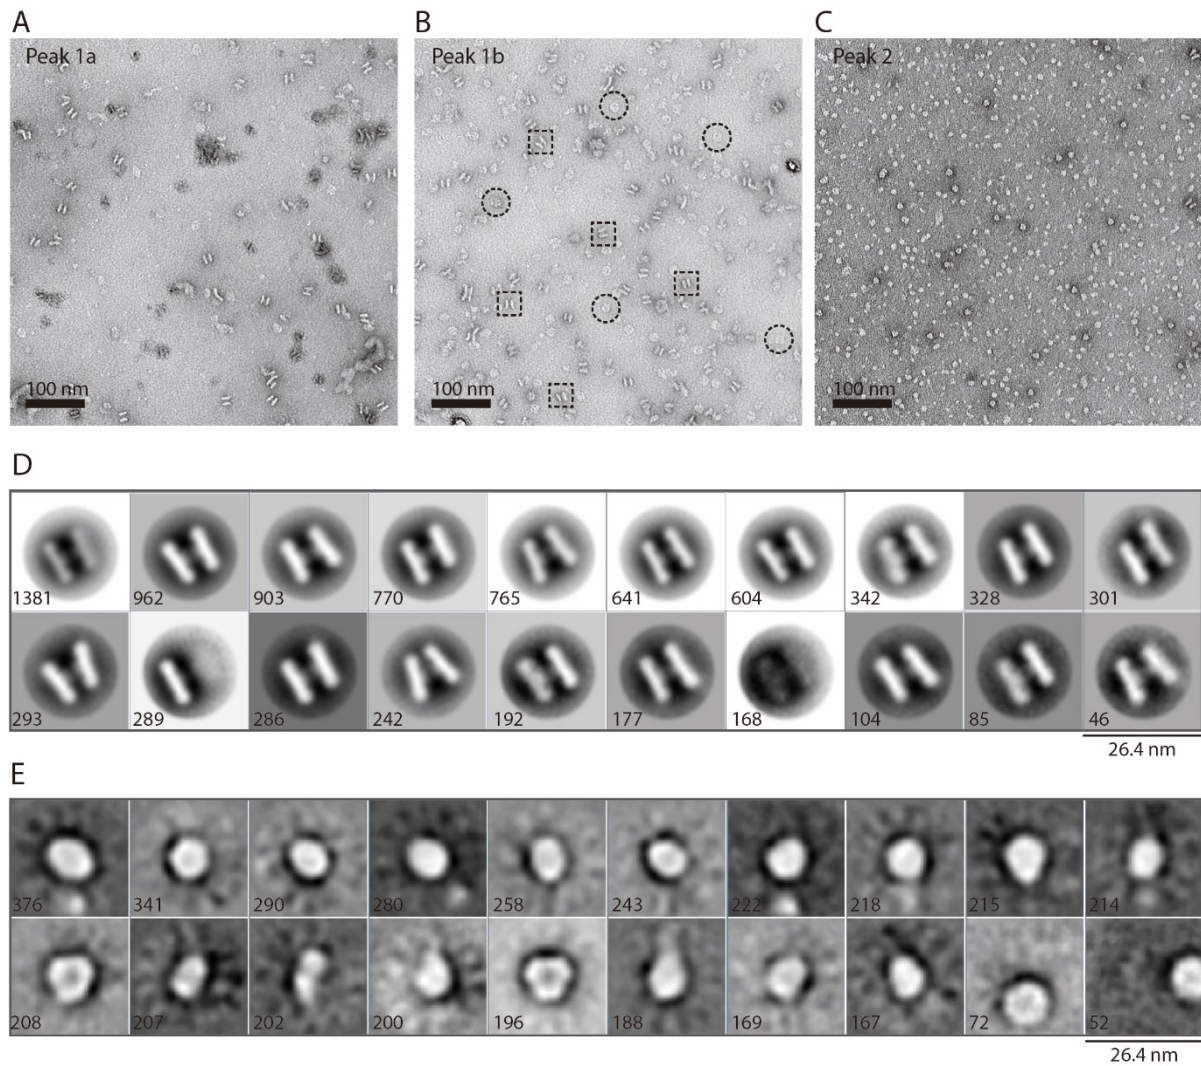

Figure S2

**Figure S2. Characterization of CAV1 complexes purified from *E. coli*.** Representative negative stain images of particles found in Peaks 1a (A), 1b (B), and 2 (C) of gel filtration profile of CAV1-His6 purification. Peak 1b was used for further structural characterization. Examples of *en face* views are circled, and boxes mark examples of side views of dimerized 8S complexes. Scale bar, 100 nm. (D) Class averages of dimers of CAV1-His6 in peak 1a. (E) Class averages of CAV1 particles in peak 2. Bottom left numbers in D and E indicate the number of particles in each class. Scale bars in D and E, 26.4 nm.

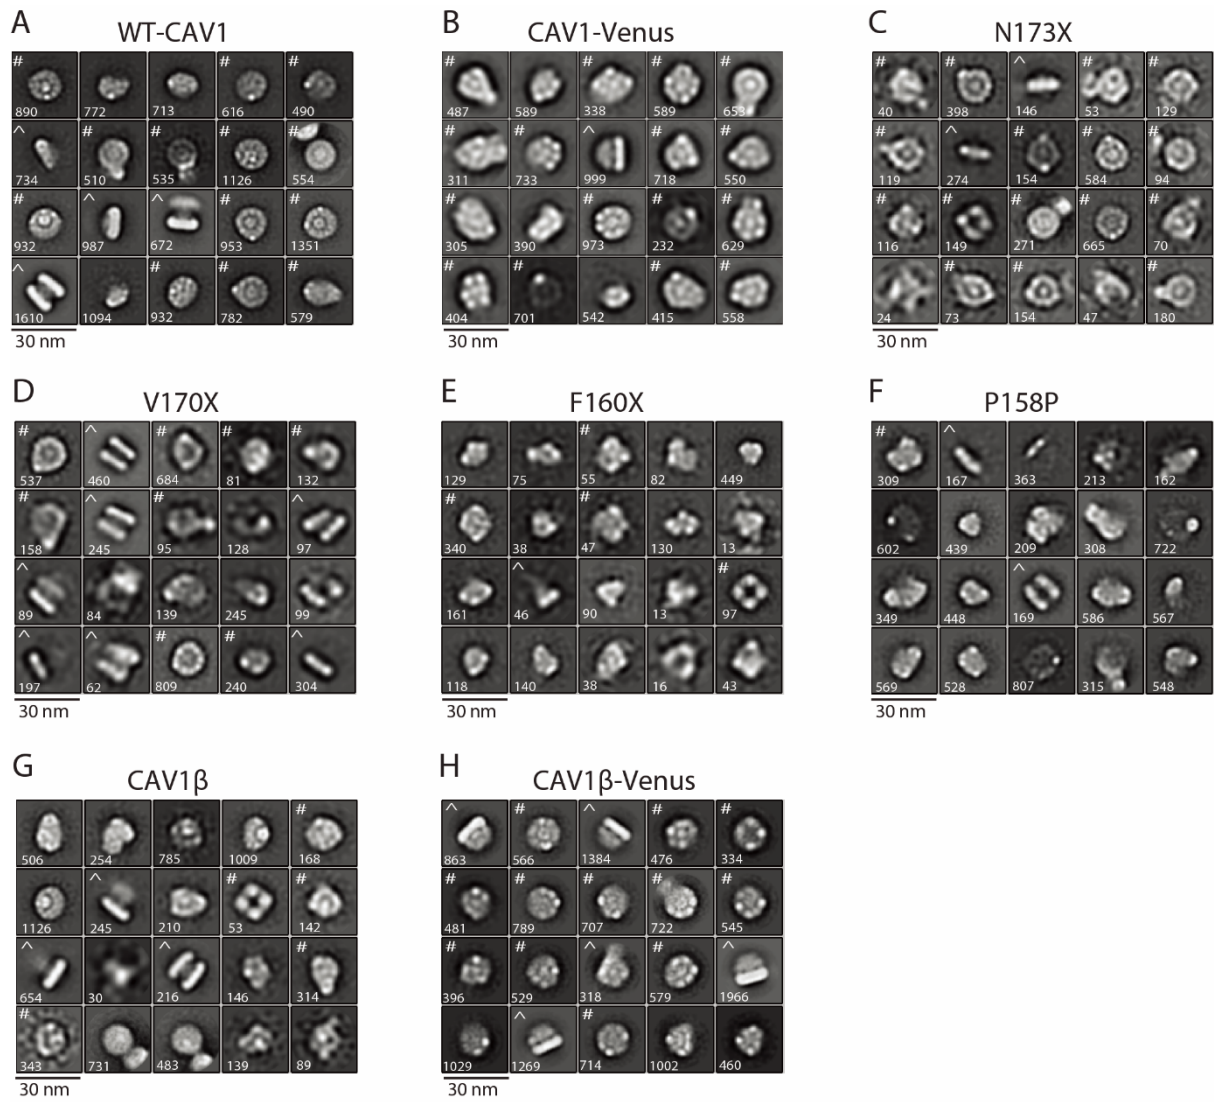

Figure S3

**Figure S3. Negative stain averages of CAV1 constructs.** Negative class averages of (A) WT-CAV1, (B) CAV1-Venus, (C) N173X, (D) V170X, (E) F160X, (F) P158P, (G) CAV1 $\beta$ , and (H) CAV1 $\beta$ -Venus. #, en face; ^, side view; bottom left number, particles per average. Scale bars, 30 nm.

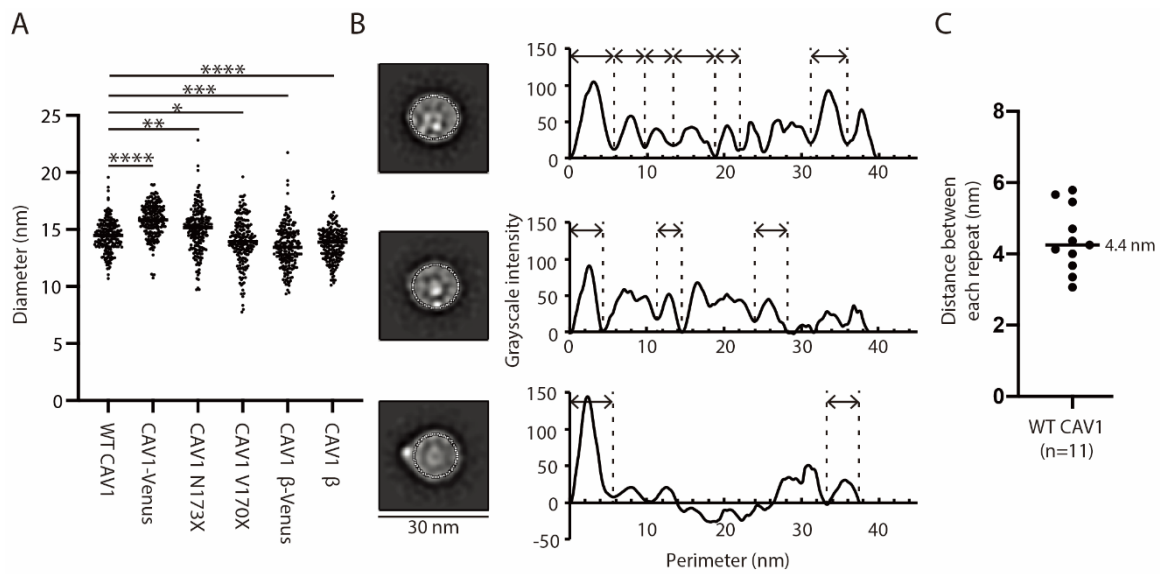

Figure S4

**Figure S4. Size measurements of negatively stained CAV1 complexes.** (A) Plots of diameters of 200 individual 8S complexes of WT CAV1, CAV1-Venus, N173X, V170X, CAV1 $\beta$ -Venus, and CAV1 $\beta$  seen in negative stain images. An ordinary one-way Analysis of Variance (ANOVA) test was performed to determine whether the difference in the means were statistically significant, whereas Tukey's multiple comparisons test was performed for pairwise comparisons. \*\*\*\* $P \leq 0.0001$ ; \*\*\* $P \leq 0.001$ ; \*\* $P \leq 0.01$ ; \* $P \leq 0.05$ . (B) Oval plot profiles for three WT CAV1 *en face* class averages. Positions of the oval used for analysis are shown in white dotted lines on the particle images. On the graphs, dotted lines mark the boundaries between adjacent globular domains, which we interpret to represent CAV1 monomers. Note that only globular domains with distinct boundaries between them were included in the analysis. (C) Plots of average distance each globular domain occupies for WT CAV1 as measured in panel B.

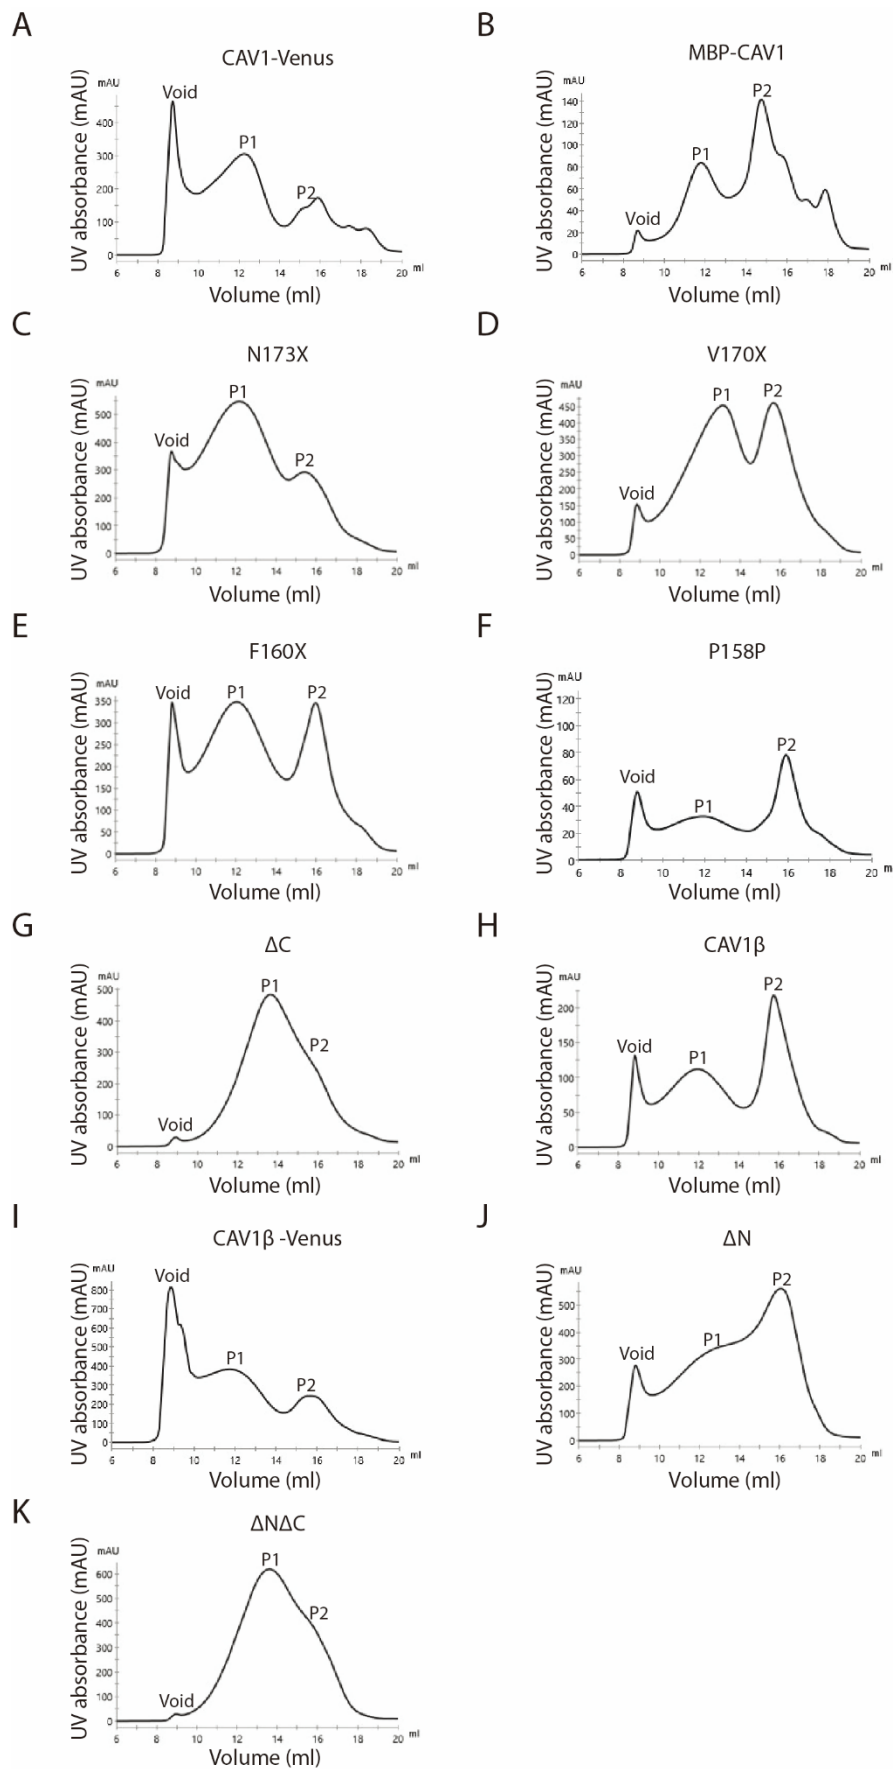

**Figure S5. FPLC traces of CAV1 constructs.** The indicated proteins were purified from *E. coli* membranes and applied to a Superose®6 Increase 10/300 GL column. Shown are the elution profiles for CAV1-Venus (**A**), MBP-CAV1 (**B**), N173X (**C**), V170X (**D**), F160X (**E**), P158P (**F**),  $\Delta C$  (**G**), CAV1 $\beta$  (**H**), CAV1 $\beta$ -Venus (**I**),  $\Delta N$  (**J**), and  $\Delta N\Delta C$  (**K**). For all of the traces listed above, Peak 1 contains the fully organized oligomers and was used for structural characterization.

Figure S5



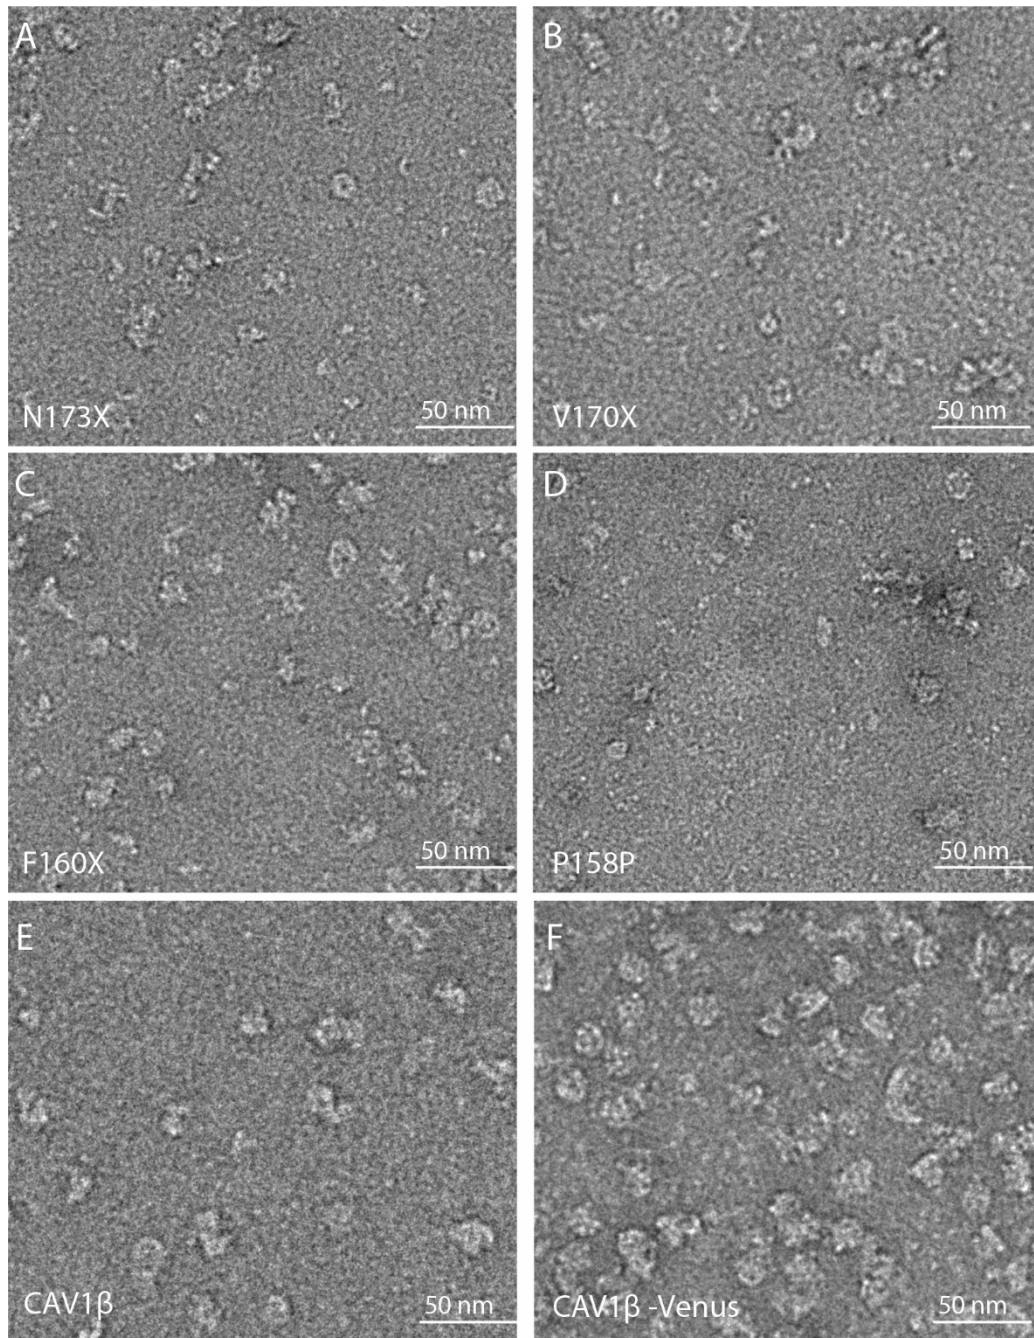

Figure S6

**Figure S6. Negative stain analysis of CAV1 C-terminus truncations and CAV1 $\beta$ .** Representative negative stain images of (A) N173X, (B) V170X, (C) F160X, (D) P158P, (E) CAV1 $\beta$ , and (F) CAV1 $\beta$ -Venus. Scale bars, 50 nm.

**Table S1. Summary of 8S complex diameter measurements.**

|                    | <b>WT CAV1</b> | <b>CAV1-Venus</b> | <b>N173X</b>   | <b>V170X</b>   | <b>CAV1<math>\beta</math>-Venus</b> | <b>CAV1<math>\beta</math></b> |
|--------------------|----------------|-------------------|----------------|----------------|-------------------------------------|-------------------------------|
| N                  | 200            | 200               | 200            | 200            | 200                                 | 200                           |
| Mean $\pm$ SD (nm) | 14.4 $\pm$ 1.4 | 15.8 $\pm$ 1.4    | 15.0 $\pm$ 2.0 | 14.0 $\pm$ 2.0 | 13.7 $\pm$ 1.4                      | 13.5 $\pm$ 1.9                |



**Table S2. Constructs used in this study.**

| <b>Construct</b>      | <b>Species</b>      | <b>Backbone</b> | <b>CAV1 Sequence</b>   | <b>Tags</b>                  | <b>Source</b> |
|-----------------------|---------------------|-----------------|------------------------|------------------------------|---------------|
| WT CAV1               | <i>Homo sapiens</i> | pET20           | Full-length            | -LE-6His                     | This study    |
| N173X                 | <i>Homo sapiens</i> | pET20           | 1-172                  | -LE-6His                     | This study    |
| V170X                 | <i>Homo sapiens</i> | pET20           | 1-169                  | -LE-6His                     | This study    |
| F160X                 | <i>Homo sapiens</i> | pET20           | 1-159                  | -LE-6His                     | This study    |
| P158P                 | <i>Homo sapiens</i> | pET20           | 1-158+novel C-terminus | -LE-6His                     | This study    |
| $\Delta$ C            | <i>Homo sapiens</i> | pET20           | 1-147                  | -LE-6His                     | This study    |
| CAV1 $\beta$          | <i>Homo sapiens</i> | pET20           | 32-178                 | -LE-6His                     | This study    |
| $\Delta$ N            | <i>Homo sapiens</i> | pET20           | 1, 49-178              | -LE-6His                     | This study    |
| $\Delta$ N $\Delta$ C | <i>Homo sapiens</i> | pET20           | 1, 49-147              | -LE-6His                     | This study    |
| MBP-CAV1              | <i>Homo sapiens</i> | pET28           | Full-length            | 6His-MBP-TEV-6His-Factor Xa- | This study    |
| CAV1-Venus            | <i>Homo sapiens</i> | pET28           | Full-length            | -TEV-Venus-10His             | This study    |
| CAV1 $\beta$ - Venus  | <i>Homo sapiens</i> | pET28           | 32-178                 | -TEV-Venus-10His             | This study    |

**Table S3. Primers used for plasmid construction in this study.**

| WT CAV1             |                                                                     |
|---------------------|---------------------------------------------------------------------|
| Forward             | 5'GCGGCCCATATGTCTGGTGGTAAATACGTTGACTCTGAAGG3'                       |
| Reverse             | 5'GCGGCCCTCGAGGATTTCTTTCTGCAGGTTGATACG3'                            |
| N173X               |                                                                     |
| Forward             | 5'GCGGCCCATATGTCTGGTGGTAAATACGTTGACTCTGAAGG3'                       |
| Reverse             | 5'GCGGCCCTCGAGGATACGAACGTTAGAGAAGATTTTACC3'                         |
| V170X               |                                                                     |
| Forward             | 5'GCGGCCCATATGTCTGGTGGTAAATACGTTGACTCTGAAGG3'                       |
| Reverse             | 5'GCGGCCCTCGAGGTTAGAGAAGATTTTACCAACCGCTTCG3'                        |
| F160X               |                                                                     |
| Forward             | 5'GCGGCCCATATGTCTGGTGGTAAATACGTTGACTCTGAAGG3'                       |
| Reverse             | 5'GCGGCCCTCGAGCAGCGGGTCGCAAACGGTGTGAACG3'                           |
| P158P               |                                                                     |
| Forward             | 5'GCGGCCCATATGTCTGGTGGTAAATACGTTGACTCTGAAGG3'                       |
| Reverse             | 5'GCGGCCCTCGAGCTTATATTTCTTTCTGCAAGTTGATGCGG3'                       |
| $\Delta C$          |                                                                     |
| Forward             | 5'GCGGCCCATATGTCTGGTGGTAAATACGTTGACTCTGAAGG3'                       |
| Reverse             | 5'GCGGCCCTCGAGAACACGAGAGATGCACTGG3'                                 |
| CAV1 $\beta$        |                                                                     |
| Forward             | 5'GCGGCCCATATGGCGGACGAACTGTCTG3'                                    |
| Reverse             | 5'GCGGCCCTCGAGGATTTCTTTCTGCAGGTTGATACG3'                            |
| $\Delta N$          |                                                                     |
| Forward             | 5'GCGGCCCATATGATCGACCTGGTTAACCG3'                                   |
| Reverse             | 5'GCGGCCCTCGAGGATTTCTTTCTGCAGGTTGATACG3'                            |
| $\Delta N\Delta C$  |                                                                     |
| Forward             | 5'GCGGCCCATATGATCGACCTGGTTAACCG3'                                   |
| Reverse             | 5'GCGGCCCTCGAGAACACGAGAGATGCACTGG3'                                 |
| MBP-CAV1            |                                                                     |
| Forward             | 5'CGGGATCCCATCATCATCATCATATCGAAGGTCGTATGTCTGGGGG<br>CAAATACGTAGAC3' |
| Reverse             | 5'CGGAATTCTTATATTTCTTTCTGCAAGTTGATGCG3'                             |
| CAV1 $\beta$ -Venus |                                                                     |
| Forward             | 5'GATATACCATGGCGGACGAACTGTCTG3'                                     |
| Reverse             | 5'CACGCCTCGAGATCTAAGCTTTCCGGAGCCCTG3'                               |
